# Supplementary material for: Combining machine-learning models with first-principles high-throughput calculations to accelerate the search for promising thermoelectric materials
Source: Royal Society of Chemistry journal article supplement (doi:10.1039/d4tc03403a), 2024-11-05
Supplement: d4tc03403a2.pdf [file d4tc03403a2.pdf]

## Supplementary Information

### Combining Machine Learning Models with First-Principles High-Throughput Calculation to Accelerate the Search of Promising Thermoelectric Materials

Tao Fan\*, Artem R. Oganov

Skolkovo Institute of Science and Technology, Bolshoy Boulevard 30, bld. 1, 121205  
Moscow, Russia.

\*Email: [Tao.Fan@skoltech.ru](mailto:Tao.Fan@skoltech.ru)

#### Labeling the dataset

Since our aim is to train a classification model to distinguish good and not good thermoelectric materials, the first step is labeling each sample in n type and p type datasets, respectively. Currently we have the maximum power factor ( $PF_{\max}$ ) value in the temperature range 300 K to 1000 K, which can represent the capability of electronic transport properties of a compound. In order to label the sample, we need to decide the boundary value of  $PF_{\max}$  which separates the samples as good (label 1) and not good (label 0). Recall the definition of figure of merit  $ZT$ ,

$$ZT = \frac{\alpha^2 \sigma T}{\kappa} = \frac{PF \cdot T}{\kappa}$$

thus

$$PF = \frac{ZT \cdot \kappa}{T}$$

Usually, a compound with  $ZT$  larger than 1 is thought as good thermoelectric material. The thermal conductivity  $\kappa$  include lattice part ( $\kappa_L$ ) and electron part ( $\kappa_e$ ). Here for the purpose of simplifying the problem, we assume only lattice thermal conductivity matters and omit the contribution from the electrons. But we need to emphasize that the  $PF_{\max}$  is generally achieved at high carrier concentrations, where  $\kappa_e$  can sometimes be comparable with or even exceed  $\kappa_L$ . The lowest lattice thermal conductivity a compound can reach is so called amorphous limit, which is possible when the phonons have a mean free path  $l$  on the order of the interatomic spacing[1,2]. The value of the amorphous limit is usually between  $0.2 \text{ W} \cdot \text{m}^{-1} \cdot \text{K}^{-1}$  and  $0.5 \text{ W} \cdot \text{m}^{-1} \cdot \text{K}^{-1}$ . Here we use the lower boundary  $0.2 \text{ W} \cdot \text{m}^{-1} \cdot \text{K}^{-1}$ . Then, we can calculate the lowest possible  $PF_{\max}$  which could lead to  $ZT$  larger than 1 in the temperature range of 300 K to 1000 K,

$$\frac{1 \cdot 0.2}{1000} = 0.0002 \leq PF_{\max} \leq \frac{1 \cdot 0.2}{300} = 0.00067 \Leftrightarrow$$

$$2 \mu\text{W} \cdot \text{cm}^{-1} \cdot \text{K}^{-2} \leq PF_{\max} \leq 6.7 \mu\text{W} \cdot \text{cm}^{-1} \cdot \text{K}^{-2}$$

Choosing which value exactly as the boundary for good and not good thermoelectric materials is heuristic. If selecting a value close to  $2 \mu\text{W} \cdot \text{cm}^{-1} \cdot \text{K}^{-2}$ , we actually lower the standard and expand the searching space, but at the risk of including many compounds that are actually not promising and wasting our resources. If selecting a value close to  $6.7 \mu\text{W} \cdot \text{cm}^{-1} \cdot \text{K}^{-2}$ , we lift the standard and narrow the search space, but also at the risk of missing some promising compounds. Here we use the boundary value as  $5 \mu\text{W} \cdot \text{m}^{-1}$

$^1 \cdot \text{K}^{-2}$ , because, practically it is rare to get such a low kappa value as  $0.2 \text{ W} \cdot \text{m}^{-1} \cdot \text{K}^{-1}$ , and also we are more interested in materials showing good performance near room temperature. According to this boundary value, for n type dataset, #positive:#negative = 308:444, while for p type dataset, #positive:#negative = 244:513.

Table S1. Elemental properties used to compute composition descriptors

| Atomic Number         | Mendeleev Number        | Atomic Weight                          | Melting Temperature                 | Column                              |
|-----------------------|-------------------------|----------------------------------------|-------------------------------------|-------------------------------------|
| Row                   | Covalent Radius         | Electron Negativity                    | # s Valence Electrons               | # p Valence Electrons               |
| # d Valence Electrons | # f Valence Electrons   | Total # Valance Electrons              | # Unfilled s States                 | # Unfilled p States                 |
| # Unfilled d States   | # Unfilled f States     | Total # Unfilled States                | Specific Volume of 0 K Ground State | Band Gap Energy of 0 K Ground State |
| Electron Affinity     | First Ionization Energy | Space Group Number of 0 K Ground State |                                     |                                     |

Table S2. Top 50 non-cubic n type thermoelectric materials found in this work. Entry id refers to the id number in Materials Project database.  $N$  is the band degeneracy,  $m_c^*$  the conductivity effective mass,  $m_d^*$  the density of states effective mass,  $E_g$  the band gap, and  $\Xi$  the deformation potential constant.  $PF_{\text{max}}$  was calculated within temperature range from 300 K to 1000 K

| Formula                           | Entry id   | $N$ | $m_c^*$ | $m_d^*$ | $E_g$ (eV) | $\Xi$ (eV) | $PF_{\text{max}}$ ( $\mu\text{W} \cdot \text{cm}^{-1} \cdot \text{K}^{-2}$ ) |
|-----------------------------------|------------|-----|---------|---------|------------|------------|------------------------------------------------------------------------------|
| $\text{Ge}_5\text{Te}_4\text{Se}$ | mp-1224356 | 12  | 0.129   | 0.533   | 0.226      | 11.022     | 82.032                                                                       |
| $\text{KBiSe}_2$                  | mp-36539   | 8   | 0.226   | 1.485   | 0.814      | 7.098      | 74.726                                                                       |
| $\text{TbAsSe}$                   | mp-1102476 | 2   | 0.046   | 0.104   | 0.125      | 4.166      | 59.381                                                                       |
| $\text{DyAsSe}$                   | mp-1102952 | 2   | 0.031   | 0.073   | 0.073      | 4.826      | 50.953                                                                       |
| $\text{YAsSe}$                    | mp-1095603 | 2   | 0.037   | 0.087   | 0.096      | 5.167      | 50.362                                                                       |
| $\text{PbS}$                      | mp-1018115 | 4   | 0.187   | 0.320   | 0.915      | 8.562      | 44.409                                                                       |
| $\text{HoAsSe}$                   | mp-1212091 | 2   | 0.024   | 0.052   | 0.032      | 4.710      | 43.052                                                                       |
| $\text{PbSe}$                     | mp-1063670 | 4   | 0.186   | 0.339   | 0.578      | 8.079      | 39.249                                                                       |
| $\text{TbAsS}$                    | mp-        | 3   | 0.120   | 0.185   | 0.054      | 9.167      | 35.943                                                                       |

|                                                   |            |    |       |       |        |        |        |
|---------------------------------------------------|------------|----|-------|-------|--------|--------|--------|
|                                                   | 1101828    |    |       |       |        |        |        |
| YSe <sub>2</sub>                                  | mp-1232213 | 2  | 0.362 | 1.323 | 0.145  | 3.000  | 33.333 |
| SmAsSe                                            | mp-1208883 | 2  | 0.060 | 0.166 | 0.133  | 9.067  | 28.309 |
| GeTe                                              | mp-1080459 | 4  | 0.151 | 0.260 | 0.454  | 7.901  | 27.554 |
| Ga <sub>2</sub> Te <sub>5</sub>                   | mp-2371    | 6  | 0.211 | 0.478 | 0.944  | 8.554  | 25.120 |
| YAsS                                              | mp-1102959 | 2  | 0.045 | 0.374 | 0.056  | 10.117 | 24.806 |
| ErAsSe <sub>4</sub>                               | mp-1213048 | 2  | 0.023 | 0.048 | 0.024  | 7.196  | 23.454 |
| Te <sub>4</sub> Pb <sub>5</sub> Se                | mp-1217406 | 4  | 0.172 | 0.479 | 0.590  | 10.084 | 22.717 |
| Bi <sub>2</sub> Se <sub>2</sub> S                 | mp-1227504 | 4  | 0.375 | 0.719 | 0.721  | 8.396  | 22.620 |
| TlGaTe <sub>2</sub>                               | mp-3785    | 6  | 0.225 | 0.455 | 0.532  | 8.761  | 21.611 |
| Tl <sub>9</sub> SbTe <sub>6</sub>                 | mp-34292   | 5  | 0.198 | 0.730 | 0.634  | 8.077  | 20.452 |
| NdTl <sub>2</sub> InTe <sub>4</sub>               | mp-1220095 | 10 | 0.276 | 1.027 | 0.968  | 8.991  | 19.229 |
| RbDy <sub>2</sub> Ag <sub>3</sub> Te <sub>5</sub> | mp-1190502 | 2  | 0.343 | 0.466 | 1.007  | 3.706  | 17.909 |
| Tl <sub>9</sub> SbSe <sub>6</sub>                 | mp-676274  | 5  | 0.305 | 0.990 | 0.728  | 7.443  | 17.111 |
| BaTe <sub>2</sub>                                 | mp-2150    | 4  | 0.345 | 1.275 | 0.343  | 7.306  | 17.080 |
| Ba <sub>2</sub> HfS <sub>4</sub>                  | mp-9321    | 1  | 0.264 | 0.904 | 0.872  | 4.502  | 16.683 |
| Tl <sub>9</sub> BiSe <sub>6</sub>                 | mp-34361   | 5  | 0.287 | 0.844 | 0.688  | 7.403  | 16.403 |
| TlCu <sub>7</sub> S <sub>4</sub>                  | mp-21964   | 6  | 0.557 | 1.398 | 0.641  | 9.973  | 15.062 |
| BiSbSe <sub>3</sub>                               | mp-1227508 | 4  | 0.305 | 0.555 | 0.638  | 8.233  | 14.871 |
| ErPS                                              | mp-1191596 | 1  | 0.306 | 0.491 | 0.1137 | 4.485  | 14.762 |
| LuCuPbSe <sub>3</sub>                             | mp-1205378 | 2  | 0.382 | 0.619 | 0.996  | 8.820  | 14.169 |
| Dy <sub>3</sub> CuSe <sub>6</sub>                 | mp-1225646 | 1  | 0.107 | 0.307 | 0.660  | 8.321  | 13.846 |
| Ba <sub>2</sub> ZrS <sub>4</sub>                  | mp-3813    | 1  | 0.264 | 1.002 | 0.631  | 5.067  | 13.785 |
| Pr <sub>2</sub> InCuS <sub>5</sub>                | mp-1220176 | 4  | 0.639 | 1.661 | 0.941  | 10.550 | 13.756 |
| Sm <sub>3</sub> CuSe <sub>6</sub>                 | mp-1219332 | 1  | 0.121 | 0.337 | 0.733  | 7.700  | 13.733 |
| Ba <sub>5</sub> Hf <sub>4</sub> S <sub>13</sub>   | mp-557032  | 1  | 0.261 | 0.677 | 0.664  | 5.142  | 13.672 |

|                                                 |            |   |       |       |       |        |        |
|-------------------------------------------------|------------|---|-------|-------|-------|--------|--------|
| SnPbS <sub>2</sub>                              | mp-1218951 | 4 | 0.216 | 0.361 | 0.626 | 8.475  | 13.518 |
| GeS                                             | mp-12910   | 2 | 0.318 | 1.352 | 0.602 | 7.472  | 13.429 |
| PtS                                             | mp-288     | 5 | 0.464 | 0.901 | 0.407 | 14.723 | 13.411 |
| Sr <sub>3</sub> Sb <sub>4</sub> S <sub>9</sub>  | mp-29295   | 2 | 0.381 | 1.574 | 1.014 | 6.183  | 13.409 |
| LiCuS <sub>2</sub>                              | mp-766486  | 4 | 0.612 | 1.159 | 0.546 | 7.738  | 12.989 |
| CuSbSe <sub>2</sub>                             | mp-20331   | 4 | 0.396 | 0.668 | 0.510 | 9.099  | 12.819 |
| Bi <sub>2</sub> Se <sub>3</sub>                 | mp-23164   | 4 | 0.256 | 0.527 | 0.607 | 8.475  | 12.794 |
| GeSe                                            | mp-700     | 2 | 0.258 | 1.237 | 0.867 | 7.181  | 12.542 |
| Ba <sub>4</sub> Hf <sub>3</sub> S <sub>10</sub> | mp-1189858 | 1 | 0.258 | 0.669 | 0.704 | 5.176  | 12.535 |
| TlSe                                            | mp-1836    | 4 | 0.212 | 0.543 | 0.197 | 7.317  | 12.486 |
| BaCu <sub>2</sub> Te <sub>2</sub>               | mp-30133   | 4 | 0.384 | 0.766 | 0.602 | 8.109  | 12.420 |
| LuCuPbSe <sub>3</sub>                           | mp-583052  | 3 | 0.434 | 0.603 | 1.053 | 7.586  | 12.389 |
| ZnCu <sub>2</sub> SiTe <sub>4</sub>             | mp-1078498 | 3 | 0.133 | 0.210 | 0.166 | 12.644 | 12.218 |
| NaTe                                            | mp-28353   | 2 | 0.196 | 0.373 | 0.520 | 6.282  | 12.026 |
| Er <sub>2</sub> Te <sub>3</sub>                 | mp-14643   | 2 | 0.306 | 0.376 | 0.601 | 5.392  | 11.793 |
| TmCuPbSe <sub>3</sub>                           | mp-865269  | 2 | 0.406 | 0.662 | 1.041 | 8.600  | 11.421 |

Table S3. Top 50 non-cubic p type thermoelectric materials found in this work. Entry id refers to the id number in Materials Project database.  $N$  is the band degeneracy,  $m_c^*$  the conductivity effective mass,  $m_d^*$  the density of states effective mass,  $E_g$  the band gap, and  $\bar{\mathcal{E}}$  the deformation potential constant.  $PF_{\max}$  was calculated within temperature range from 300 K to 1000 K

| Formula                            | Entry id   | $N$ | $m_c^*$ | $m_d^*$ | $E_g$<br>(eV) | $\bar{\mathcal{E}}$<br>(eV) | $PF_{\max}$<br>( $\mu\text{W}\cdot\text{cm}^{-1}\cdot\text{K}^{-2}$ ) |
|------------------------------------|------------|-----|---------|---------|---------------|-----------------------------|-----------------------------------------------------------------------|
| KBiSe <sub>2</sub>                 | mp-36539   | 12  | 0.356   | 2.423   | 0.814         | 7.264                       | 73.372                                                                |
| Ge <sub>5</sub> Te <sub>4</sub> Se | mp-1224356 | 4   | 0.034   | 0.112   | 0.226         | 13.397                      | 61.018                                                                |
| TbAsS                              | mp-1101828 | 2   | 0.034   | 0.110   | 0.054         | 5.117                       | 59.956                                                                |
| NaBiSe <sub>2</sub>                | mp-35015   | 4   | 0.151   | 0.649   | 0.679         | 9.070                       | 34.868                                                                |
| Ba <sub>2</sub> HfS <sub>4</sub>   | mp-9321    | 6   | 0.878   | 2.902   | 0.872         | 5.903                       | 34.083                                                                |
| NaSbS <sub>2</sub>                 | mp-1173513 | 4   | 0.053   | 0.417   | 0.089         | 11.117                      | 32.156                                                                |
| LiBiS <sub>2</sub>                 | mp-33526   | 4   | 0.159   | 0.517   | 0.811         | 10.942                      | 27.934                                                                |

|                                                 |            |   |       |        |       |        |        |
|-------------------------------------------------|------------|---|-------|--------|-------|--------|--------|
| Ba <sub>2</sub> ZrS <sub>4</sub>                | mp-3813    | 6 | 0.888 | 2.887  | 0.631 | 6.346  | 27.435 |
| Ba <sub>4</sub> Hf <sub>3</sub> S <sub>10</sub> | mp-1189858 | 6 | 0.776 | 2.182  | 0.704 | 7.148  | 27.416 |
| PbS                                             | mp-1018115 | 2 | 0.211 | 0.535  | 0.915 | 10.235 | 26.501 |
| DyAsSe                                          | mp-1102952 | 2 | 0.036 | 0.073  | 0.073 | 9.236  | 25.257 |
| YAsSe                                           | mp-1095603 | 2 | 0.043 | 0.089  | 0.096 | 9.417  | 24.958 |
| PbSe                                            | mp-1063670 | 4 | 0.156 | 0.385  | 0.579 | 16.364 | 23.621 |
| TbAsSe                                          | mp-1102476 | 2 | 0.057 | 0.110  | 0.125 | 9.367  | 23.303 |
| Ba <sub>4</sub> Zr <sub>3</sub> S <sub>10</sub> | mp-14883   | 6 | 0.787 | 2.152  | 0.485 | 7.780  | 22.199 |
| Te <sub>4</sub> Pb <sub>5</sub> Se              | mp-1217406 | 4 | 0.134 | 0.443  | 0.590 | 12.333 | 21.496 |
| Sm <sub>10</sub> Se <sub>19</sub>               | mp-29832   | 4 | 0.398 | 2.587  | 0.269 | 9.367  | 21.099 |
| Ba <sub>3</sub> Zr <sub>2</sub> S <sub>7</sub>  | mp-9179    | 6 | 0.809 | 2.443  | 0.528 | 8.359  | 19.701 |
| Er <sub>2</sub> Se <sub>3</sub>                 | mp-1225508 | 4 | 0.517 | 1.317  | 0.230 | 7.780  | 19.586 |
| Ba <sub>3</sub> Zr <sub>2</sub> S <sub>7</sub>  | mp-554172  | 6 | 0.809 | 2.443  | 0.528 | 8.359  | 19.396 |
| MgS <sub>2</sub>                                | mp-1185953 | 6 | 0.822 | 3.948  | 0.932 | 8.628  | 19.136 |
| HoAsSe                                          | mp-1212091 | 2 | 0.026 | 0.052  | 0.032 | 9.311  | 18.522 |
| DyPS                                            | mp-1192185 | 3 | 0.613 | 1.015  | 0.295 | 7.270  | 17.628 |
| TbPS                                            | mp-1190952 | 3 | 0.657 | 1.082  | 0.355 | 7.150  | 17.436 |
| GeS                                             | mp-12910   | 4 | 0.137 | 0.307  | 0.602 | 10.118 | 17.146 |
| YPS                                             | mp-1191026 | 3 | 0.634 | 1.061  | 0.307 | 7.450  | 17.118 |
| CoAsS                                           | mp-4627    | 4 | 0.814 | 1.612  | 0.942 | 13.671 | 16.943 |
| Zn <sub>4</sub> CdSe <sub>5</sub>               | mp-1215624 | 5 | 0.803 | 1.757  | 0.920 | 7.913  | 16.667 |
| SnS                                             | mp-559676  | 4 | 0.146 | 0.344  | 0.365 | 12.498 | 15.443 |
| ErAsSe                                          | mp-1213048 | 2 | 0.025 | -0.048 | 0.024 | 9.111  | 14.926 |

|                                    |            |   |       |       |       |        |        |
|------------------------------------|------------|---|-------|-------|-------|--------|--------|
| Tm <sub>10</sub> S <sub>19</sub>   | mp-1204382 | 4 | 0.968 | 6.831 | 0.552 | 9.850  | 14.523 |
| SnTe <sub>4</sub> Pb <sub>3</sub>  | mp-1218925 | 4 | 0.051 | 0.146 | 0.060 | 11.683 | 14.484 |
| ErTeAs                             | mp-1212634 | 3 | 0.262 | 2.011 | 0.248 | 10.310 | 14.180 |
| GeTe                               | mp-1080459 | 2 | 0.086 | 0.215 | 0.454 | 11.641 | 13.893 |
| SmPS                               | mp-1191565 | 3 | 1.077 | 1.775 | 0.380 | 6.267  | 13.608 |
| Li <sub>5</sub> SbS                | mp-767409  | 2 | 0.284 | 0.857 | 0.605 | 7.331  | 13.561 |
| DyTeAs                             | mp-1212803 | 3 | 0.265 | 2.188 | 0.225 | 10.271 | 13.204 |
| BaAg <sub>2</sub> GeS <sub>4</sub> | mp-7394    | 5 | 0.753 | 1.842 | 0.585 | 11.884 | 12.880 |
| YbY <sub>2</sub> Se <sub>4</sub>   | mp-1193988 | 2 | 0.485 | 2.337 | 1.122 | 7.667  | 12.633 |
| Ga <sub>2</sub> HgTe <sub>4</sub>  | mp-1224839 | 3 | 0.406 | 1.534 | 0.326 | 9.780  | 12.507 |
| SnPb <sub>4</sub> S <sub>5</sub>   | mp-1218954 | 4 | 0.156 | 0.649 | 0.085 | 10.568 | 12.341 |
| K <sub>2</sub> Se <sub>3</sub>     | mp-7670    | 6 | 1.536 | 8.316 | 0.627 | 4.302  | 12.318 |
| GeTe <sub>2</sub> Pb               | mp-1224318 | 2 | 0.031 | 0.055 | 0.067 | 10.468 | 12.205 |
| YbTm <sub>2</sub> Se <sub>4</sub>  | mp-1193091 | 2 | 0.459 | 1.244 | 1.140 | 7.700  | 11.607 |
| YbEr <sub>2</sub> Se <sub>4</sub>  | mp-1192445 | 2 | 0.462 | 1.248 | 1.129 | 7.667  | 11.389 |
| YbHo <sub>2</sub> Se <sub>4</sub>  | mp-1194224 | 2 | 0.464 | 1.251 | 1.117 | 7.633  | 11.221 |
| CaIn <sub>2</sub> Te <sub>4</sub>  | mp-677072  | 5 | 0.425 | 1.310 | 0.653 | 10.178 | 10.823 |
| NdPS                               | mp-1191667 | 3 | 1.562 | 2.775 | 0.310 | 6.144  | 10.738 |
| SmTeAs                             | mp-1208842 | 3 | 0.265 | 1.219 | 0.167 | 10.056 | 10.475 |
| Sm <sub>2</sub> S <sub>3</sub>     | mp-1403    | 3 | 0.780 | 1.330 | 0.750 | 8.350  | 10.438 |

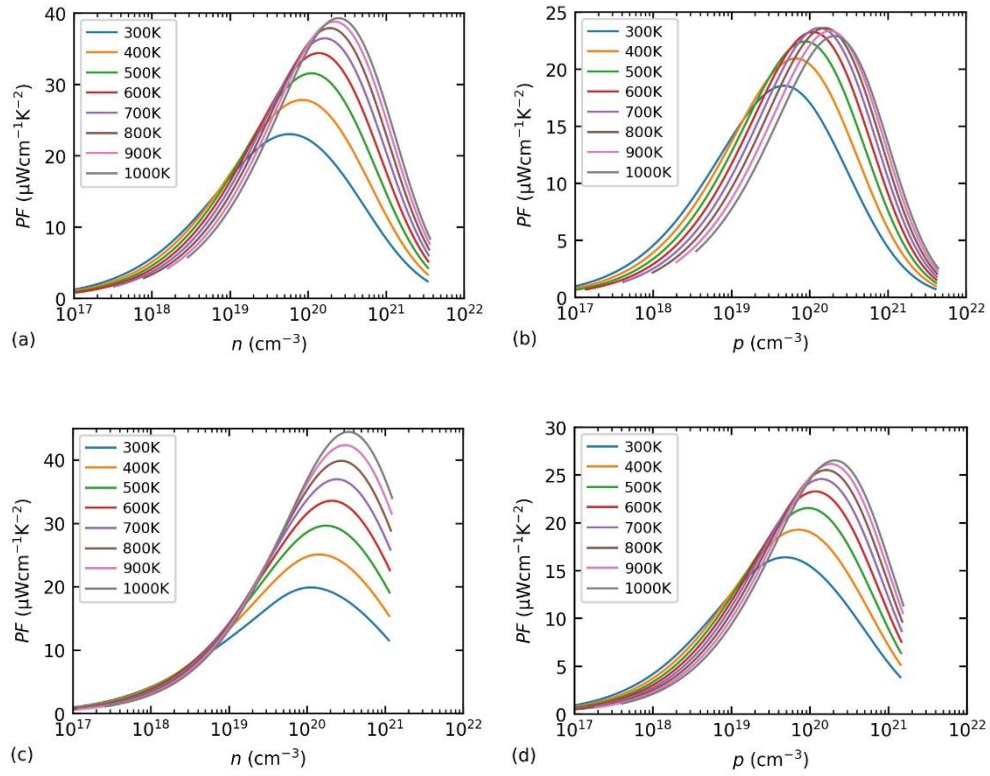

Figure S1. Power factor at varying temperatures and carrier concentrations for (a, b) PbSe and (c, d) PbS.

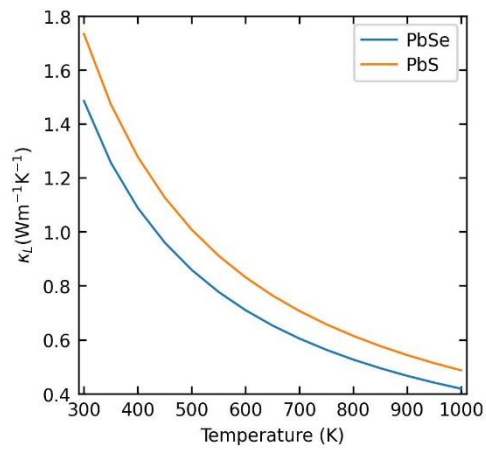

Figure S2. Lattice thermal conductivity of PbSe and PbS.

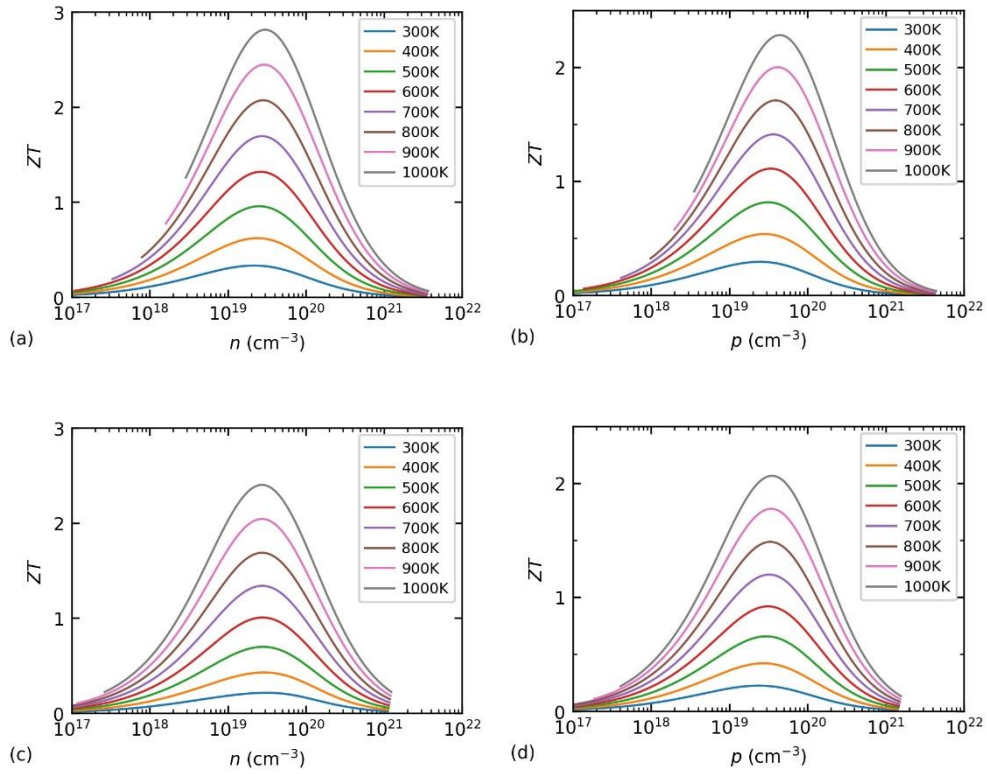

Figure S3. Figure of merit at varying temperatures and carrier concentrations for (a, b) PbSe and (c, d) PbS.

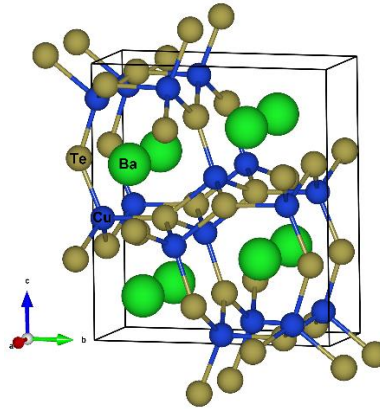

Figure S4. Crystal structures of BaCu<sub>2</sub>Te<sub>2</sub>.

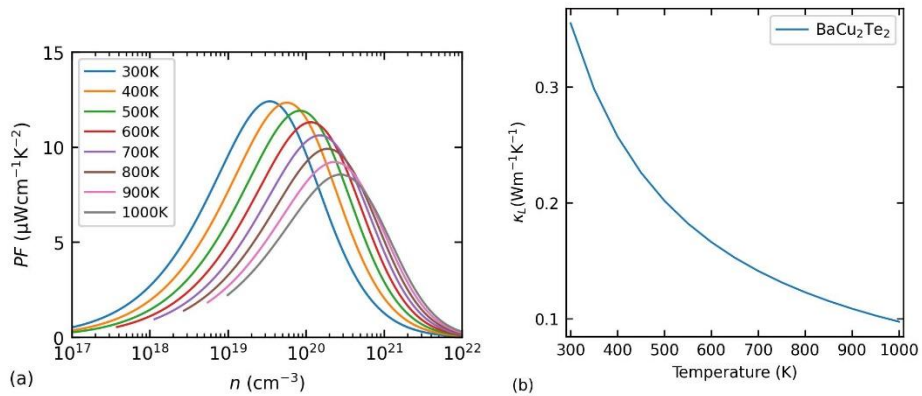



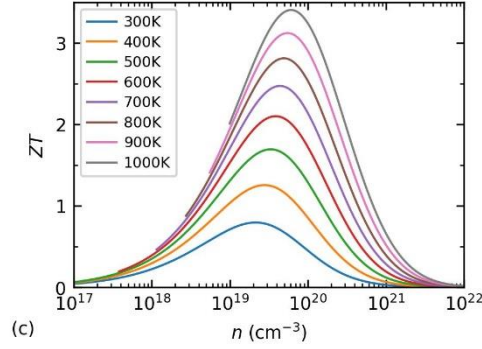

Figure S5. Thermoelectric properties of BaCu<sub>2</sub>Te<sub>2</sub> for n type transport. (a) power factor, (b) lattice thermal conductivity, and (c) figure of merit.

Table S4. The optimized hyperparameters of the models listed in Table 2

|   | Model | Hyperparameters                                                                                                                                                            |
|---|-------|----------------------------------------------------------------------------------------------------------------------------------------------------------------------------|
| N | GBDT  | subsample=0.5, min_weight_fraction_leaf=0.003, learning_rate=0.1, max_depth=7, n_estimators=650                                                                            |
|   | XGB   | tree_method='exact', importance_type='gain', scale_pos_weight=1.4404332, n_jobs=4, colsample_bynode=0.7, subsample=0.9, learning_rate=0.08, max_depth=3, n_estimators=100  |
|   | AdaB  | base_estimator__max_depth=3, learning_rate=0.5, n_estimators=500                                                                                                           |
|   | RF    | min_samples_split=2, class_weight='balanced_subsample', max_depth=10, max_features=0.2, n_estimators=100                                                                   |
| P | GBDT  | subsample=0.5, min_weight_fraction_leaf=0.0043, learning_rate=0.1, max_depth=4, n_estimators=600                                                                           |
|   | XGB   | tree_method='exact', importance_type='gain', scale_pos_weight= 2.0954545, n_jobs=4, colsample_bynode=1.0, subsample=0.7, learning_rate=0.09, max_depth=2, n_estimators=500 |
|   | AdaB  | base_estimator__max_depth=3, learning_rate=0.3, n_estimators=500                                                                                                           |
|   | RF    | min_samples_split=2, class_weight='balanced_subsample', max_depth=9, max_features=0.4, n_estimators=300                                                                    |

Table S5. Performance measure on test sets of GBDT algorithm with different input feature vectors. The bold ones are the best for each doping type

|   | features        | Acc.        | Prec.       | Recall      | F1          | AUC         |
|---|-----------------|-------------|-------------|-------------|-------------|-------------|
| N | PRDF10          | 0.86        | 0.79        | 0.87        | 0.83        | 0.93        |
|   | PRDF16          | 0.84        | 0.76        | 0.90        | 0.82        | 0.94        |
|   | PRDF20          | 0.86        | 0.78        | 0.90        | 0.84        | 0.94        |
|   | PRDF25          | 0.84        | 0.76        | 0.90        | 0.82        | 0.94        |
|   | <b>GRDF_BOP</b> | <b>0.86</b> | <b>0.78</b> | <b>0.90</b> | <b>0.84</b> | <b>0.97</b> |
|   | VORONOI         | 0.86        | 0.76        | 0.94        | 0.84        | 0.96        |

|   |               |             |             |             |             |             |
|---|---------------|-------------|-------------|-------------|-------------|-------------|
| P | PRDF10        | 0.89        | 0.90        | 0.75        | 0.82        | 0.96        |
|   | <b>PRDF16</b> | <b>0.92</b> | <b>0.95</b> | <b>0.79</b> | <b>0.86</b> | <b>0.96</b> |
|   | PRDF20        | 0.89        | 0.9         | 0.75        | 0.82        | 0.95        |
|   | PRDF25        | 0.91        | 0.95        | 0.75        | 0.84        | 0.96        |
|   | GRDF_BOP      | 0.91        | 0.90        | 0.79        | 0.84        | 0.96        |
|   | VORONOI       | 0.91        | 0.87        | 0.83        | 0.85        | 0.97        |

Table S6. Performance measure on test sets of XGB algorithm with different input feature vectors. The bold ones are the best for each doping type

|   | features        | Acc.        | Prec.       | Recall      | F1          | AUC         |
|---|-----------------|-------------|-------------|-------------|-------------|-------------|
| N | PRDF10          | 0.84        | 0.77        | 0.87        | 0.82        | 0.92        |
|   | PRDF16          | 0.83        | 0.74        | 0.90        | 0.81        | 0.93        |
|   | PRDF20          | 0.84        | 0.76        | 0.90        | 0.82        | 0.94        |
|   | PRDF25          | 0.83        | 0.75        | 0.87        | 0.81        | 0.95        |
|   | GRDF_BOP        | 0.84        | 0.76        | 0.90        | 0.82        | 0.96        |
|   | <b>VORONOI</b>  | <b>0.88</b> | <b>0.81</b> | <b>0.94</b> | <b>0.87</b> | <b>0.95</b> |
| P | PRDF10          | 0.88        | 0.83        | 0.79        | 0.81        | 0.95        |
|   | PRDF16          | 0.86        | 0.84        | 0.67        | 0.74        | 0.94        |
|   | PRDF20          | 0.87        | 0.85        | 0.71        | 0.77        | 0.91        |
|   | PRDF25          | 0.89        | 0.86        | 0.79        | 0.83        | 0.96        |
|   | <b>GRDF_BOP</b> | <b>0.92</b> | <b>0.95</b> | <b>0.79</b> | <b>0.86</b> | <b>0.96</b> |
|   | VORONOI         | 0.92        | 0.88        | 0.88        | 0.88        | 0.97        |

Table S7. Performance measure on test sets of AdaB algorithm with different input feature vectors. The bold ones are the best for each doping type

|   | features      | Acc.        | Prec.       | Recall      | F1          | AUC         |
|---|---------------|-------------|-------------|-------------|-------------|-------------|
| N | PRDF10        | 0.86        | 0.79        | 0.87        | 0.83        | 0.92        |
|   | <b>PRDF16</b> | <b>0.89</b> | <b>0.85</b> | <b>0.90</b> | <b>0.88</b> | <b>0.95</b> |
|   | PRDF20        | 0.83        | 0.76        | 0.84        | 0.80        | 0.91        |
|   | PRDF25        | 0.86        | 0.79        | 0.87        | 0.83        | 0.93        |
|   | GRDF_BOP      | 0.89        | 0.83        | 0.94        | 0.88        | 0.96        |
|   | VORONOI       | 0.87        | 0.77        | 0.97        | 0.86        | 0.97        |
| P | PRDF10        | 0.86        | 0.88        | 0.62        | 0.73        | 0.96        |
|   | PRDF16        | 0.89        | 0.86        | 0.79        | 0.83        | 0.93        |
|   | PRDF20        | 0.88        | 0.89        | 0.71        | 0.79        | 0.94        |
|   | <b>PRDF25</b> | <b>0.89</b> | <b>0.9</b>  | <b>0.75</b> | <b>0.83</b> | <b>0.93</b> |
|   | GRDF_BOP      | 0.88        | 0.89        | 0.71        | 0.79        | 0.94        |
|   | VORONOI       | 0.86        | 0.81        | 0.71        | 0.76        | 0.93        |

Table S8. Performance measure on test sets of RF algorithm with different input feature vectors. The bold ones are the best for each doping type

|   | features | Acc. | Prec. | Recall | F1   | AUC  |
|---|----------|------|-------|--------|------|------|
| N | PRDF10   | 0.84 | 0.77  | 0.87   | 0.82 | 0.92 |

|   |                 |             |             |             |             |             |
|---|-----------------|-------------|-------------|-------------|-------------|-------------|
|   | PRDF16          | 0.84        | 0.76        | 0.90        | 0.82        | 0.91        |
|   | PRDF20          | 0.87        | 0.80        | 0.90        | 0.85        | 0.93        |
|   | PRDF25          | 0.82        | 0.73        | 0.87        | 0.79        | 0.92        |
|   | <b>GRDF_BOP</b> | <b>0.88</b> | <b>0.81</b> | <b>0.94</b> | <b>0.87</b> | <b>0.96</b> |
|   | VORONOI         | 0.88        | 0.81        | 0.94        | 0.87        | 0.95        |
| P | PRDF10          | 0.86        | 0.84        | 0.67        | 0.74        | 0.91        |
|   | PRDF16          | 0.86        | 0.84        | 0.67        | 0.74        | 0.91        |
|   | PRDF20          | 0.88        | 0.86        | 0.75        | 0.80        | 0.93        |
|   | PRDF25          | 0.88        | 0.86        | 0.75        | 0.80        | 0.94        |
|   | <b>GRDF_BOP</b> | <b>0.89</b> | <b>0.90</b> | <b>0.75</b> | <b>0.82</b> | <b>0.95</b> |
|   | VORONOI         | 0.87        | 0.82        | 0.75        | 0.78        | 0.96        |

Table S9. Comparison of the performance on test sets of GBDT algorithm with input feature vector including band structure descriptors and not (woB)

|   | features     | Acc. | Prec. | Recall | F1   | AUC  |
|---|--------------|------|-------|--------|------|------|
| N | GRDF_BOP     | 0.86 | 0.78  | 0.90   | 0.84 | 0.97 |
|   | GRDF_BOP_woB | 0.80 | 0.77  | 0.74   | 0.75 | 0.88 |
|   | VORONOI      | 0.86 | 0.76  | 0.94   | 0.84 | 0.96 |
|   | VORONOI_woB  | 0.75 | 0.70  | 0.68   | 0.69 | 0.84 |
|   | PRDF16       | 0.84 | 0.76  | 0.90   | 0.82 | 0.94 |
|   | PRDF16_woB   | 0.78 | 0.79  | 0.61   | 0.69 | 0.83 |
| P | GRDF_BOP     | 0.91 | 0.90  | 0.79   | 0.84 | 0.96 |
|   | GRDF_BOP_woB | 0.80 | 0.70  | 0.67   | 0.68 | 0.82 |
|   | VORONOI      | 0.91 | 0.87  | 0.83   | 0.85 | 0.97 |
|   | VORONOI_woB  | 0.80 | 0.68  | 0.71   | 0.69 | 0.81 |
|   | PRDF16       | 0.92 | 0.95  | 0.79   | 0.86 | 0.96 |
|   | PRDF16_woB   | 0.83 | 0.74  | 0.71   | 0.72 | 0.80 |

Table S10. Comparison of the performance on test sets of XGB algorithm with input feature vector including band structure descriptors and not (woB)

|   | features     | Acc. | Prec. | Recall | F1   | AUC  |
|---|--------------|------|-------|--------|------|------|
| N | GRDF_BOP     | 0.84 | 0.76  | 0.90   | 0.82 | 0.96 |
|   | GRDF_BOP_woB | 0.80 | 0.77  | 0.74   | 0.75 | 0.88 |
|   | VORONOI      | 0.88 | 0.81  | 0.94   | 0.87 | 0.95 |
|   | VORONOI_woB  | 0.75 | 0.70  | 0.68   | 0.69 | 0.84 |
|   | PRDF16       | 0.83 | 0.74  | 0.90   | 0.81 | 0.93 |
|   | PRDF16_woB   | 0.78 | 0.79  | 0.61   | 0.69 | 0.83 |
| P | GRDF_BOP     | 0.92 | 0.95  | 0.79   | 0.86 | 0.96 |
|   | GRDF_BOP_woB | 0.80 | 0.70  | 0.67   | 0.68 | 0.82 |
|   | VORONOI      | 0.92 | 0.88  | 0.88   | 0.88 | 0.97 |
|   | VORONOI_woB  | 0.80 | 0.68  | 0.71   | 0.69 | 0.81 |
|   | PRDF16       | 0.86 | 0.84  | 0.67   | 0.74 | 0.94 |
|   | PRDF16_woB   | 0.83 | 0.74  | 0.71   | 0.72 | 0.80 |

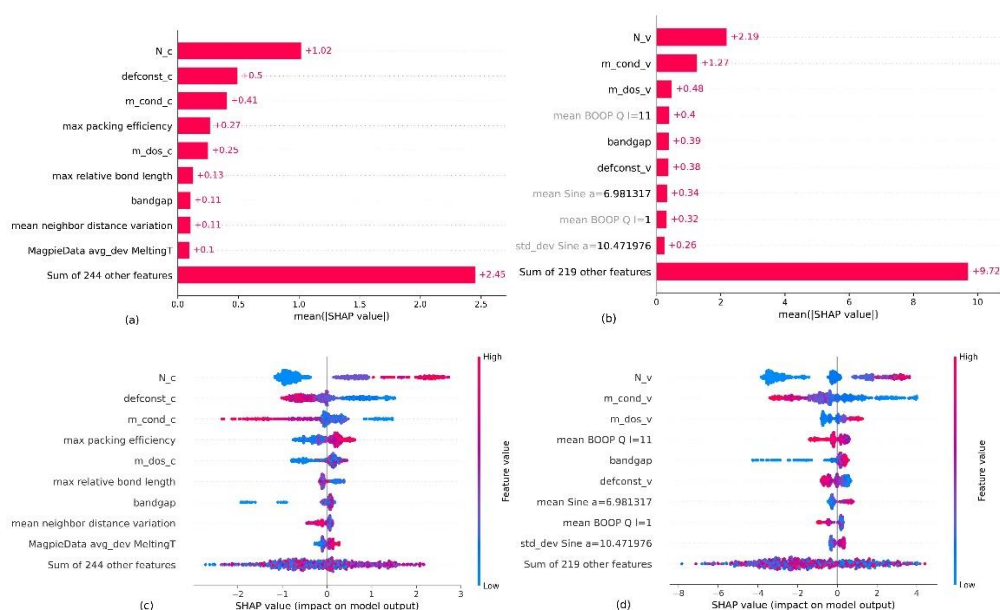

Figure S6. SHAP analysis based on XGB models in Table 2. (a)(c) for n type data, (b)(d) for p type data. (a)(b) bar chart of the average SHAP value magnitude for each input feature. (c)(d) a set of beeswarm plots, where each dot corresponds to a sample. The dot's position on the x axis shows the impact that feature has on the model's prediction for that sample. When multiple dots locate at the same x position, they pile up to show density.

Table S11. The optimized hyperparameters of the MEGNet models listed in Table 3

| Hyperparameters           | N       | P      |
|---------------------------|---------|--------|
| Initial learning rate     | 0.001   |        |
| Final learning rate       | 0.0001  |        |
| Weight decay              | 0.0001  | 0.0056 |
| nblocks                   | 3       |        |
| hidden_layer_sizes_input  | (8,4)   |        |
| hidden_layer_sizes_conv   | (8,8,4) |        |
| nlayers_set2set           | 1       |        |
| niters_set2set            | 2       |        |
| hidden_layer_sizes_output | (8,8)   |        |
| cutoff                    | 5.0     |        |

Table S12. The optimized hyperparameters of the M3GNet models listed in Table 3

| Hyperparameters       | N      | P      |
|-----------------------|--------|--------|
| Initial learning rate | 0.001  |        |
| Final learning rate   | 0.0001 |        |
| Weight decay          | 0.0026 | 0.0048 |
| nblocks               | 3      |        |
| dim_node_embedding    | 32     | 8      |
| dim_edge_embedding    | 32     | 8      |

|                  |     |   |
|------------------|-----|---|
| nlayers_set2set  | 1   |   |
| niters_set2set   | 3   |   |
| units            | 32  | 8 |
| threebody_cutoff | 5.0 |   |

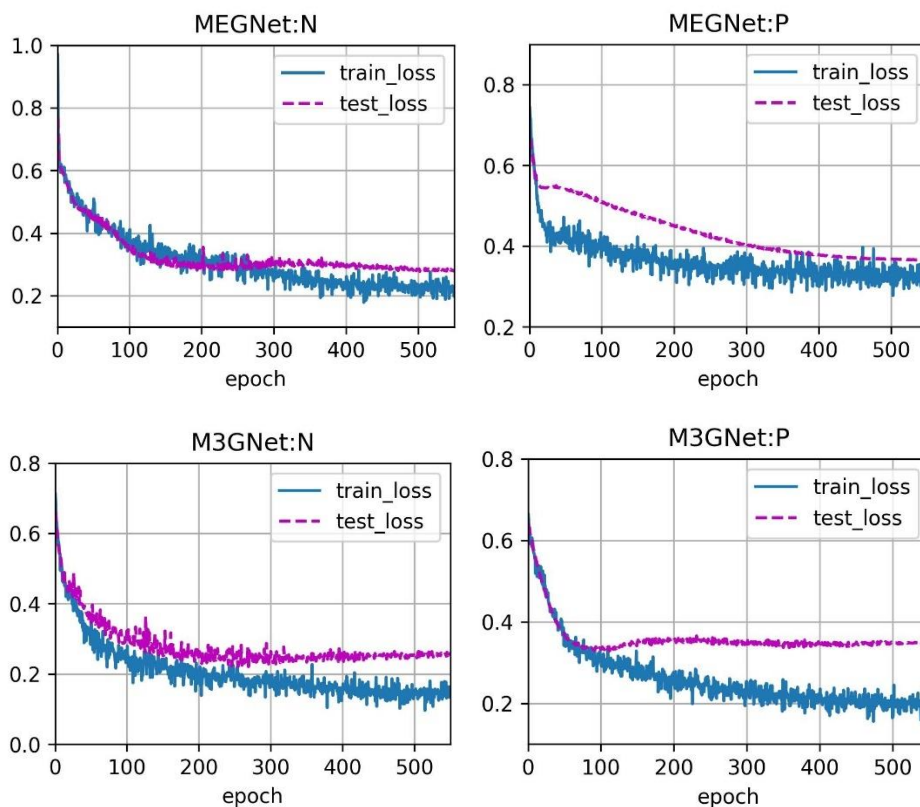

Figure S7. The final training process of the MEGNet and M3GNet models listed in Table 3.

### Reference

- [1] Nielsen, M. D., Ozolins, V., & Heremans, J. P. (2013). Lone pair electrons minimize lattice thermal conductivity. *Energy & Environmental Science*, 6(2), 570-578.
- [2] Zeier, W. G., Zevalkink, A., Gibbs, Z. M., Hautier, G., Kanatzidis, M. G., & Snyder, G. J. (2016). Thinking like a chemist: intuition in thermoelectric materials. *Angewandte Chemie International Edition*, 55(24), 6826-6841.
